# Supplementary material for: Enhanced output power of a freestanding ball-based triboelectric generator through the electrophorus effect
Source: Royal Society of Chemistry journal article supplement (doi:10.1039/c8ta05198d), 2018-01-01
Supplement: c8ta05198d1.pdf [file c8ta05198d1.pdf]

# Enhanced output power of freestanding ball-based triboelectric generator through electrophorus effect

*Tsz Hin Choy<sup>1†</sup>, Ying Ying O<sup>1†</sup>, Feichi Zhou<sup>1</sup>, Wei Xu<sup>1</sup>, Man Chung Wong<sup>1</sup>, Tao Ye<sup>2</sup>, Jianhua Hao<sup>1</sup>, and Yang Chai<sup>1\*</sup>*

<sup>1</sup> Department of Applied Physics, The Hong Kong Polytechnic University, Hung Hom, Kowloon, Hong Kong, China.

<sup>2</sup> Department of Electrical and Electronics Engineering, Southern University of Science and Technology

\*Correspondence should be addressed to: [ychai@polyu.edu.hk](mailto:ychai@polyu.edu.hk)

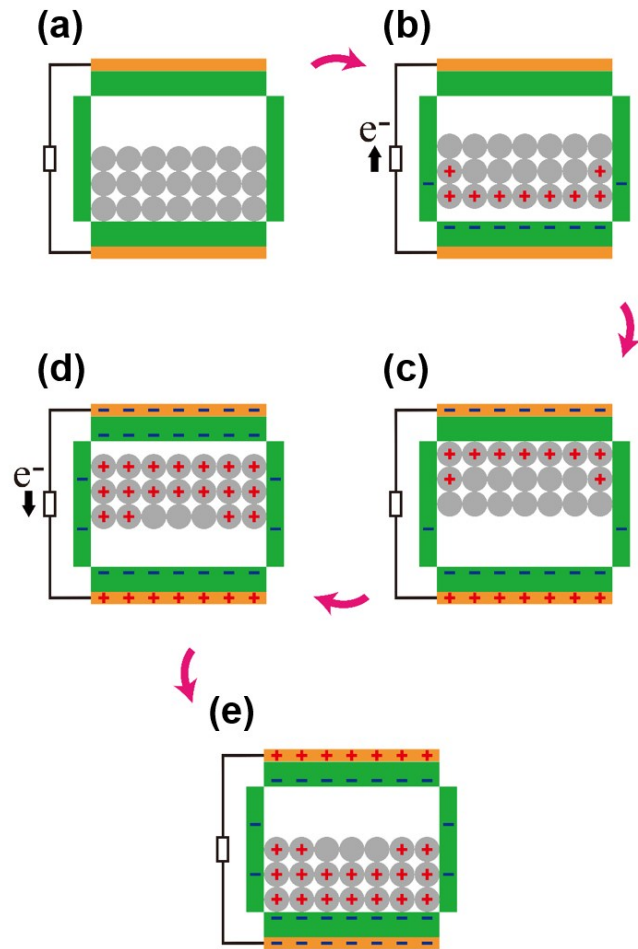

**Figure S1.** Working mechanism of ball based triboelectric generator (B-TEG) at 1<sup>st</sup> cycle. (a) Initial state: Al balls contact with bottom inner surface of PTFE cylinder. (b) First separation: Al balls move upwards and leave the bottom inner surface of PTFE cylinder. (c) First contact: Al balls contact with the top inner surface of PTFE cylinder. (d) Second separation: Al balls move downwards and leave the top inner surface of PTFE cylinder. (e) Contact to bottom surface: Al balls contact with bottom inner surface of PTFE cylinder.

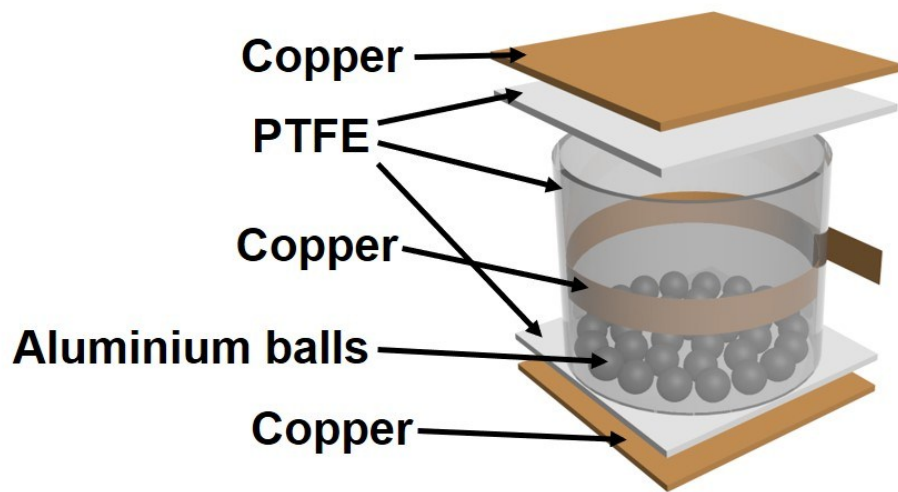

**Figure S2.** Illustration of the ball-based grounded-metal-freestanding-layer triboelectric generator (B-GTEG).

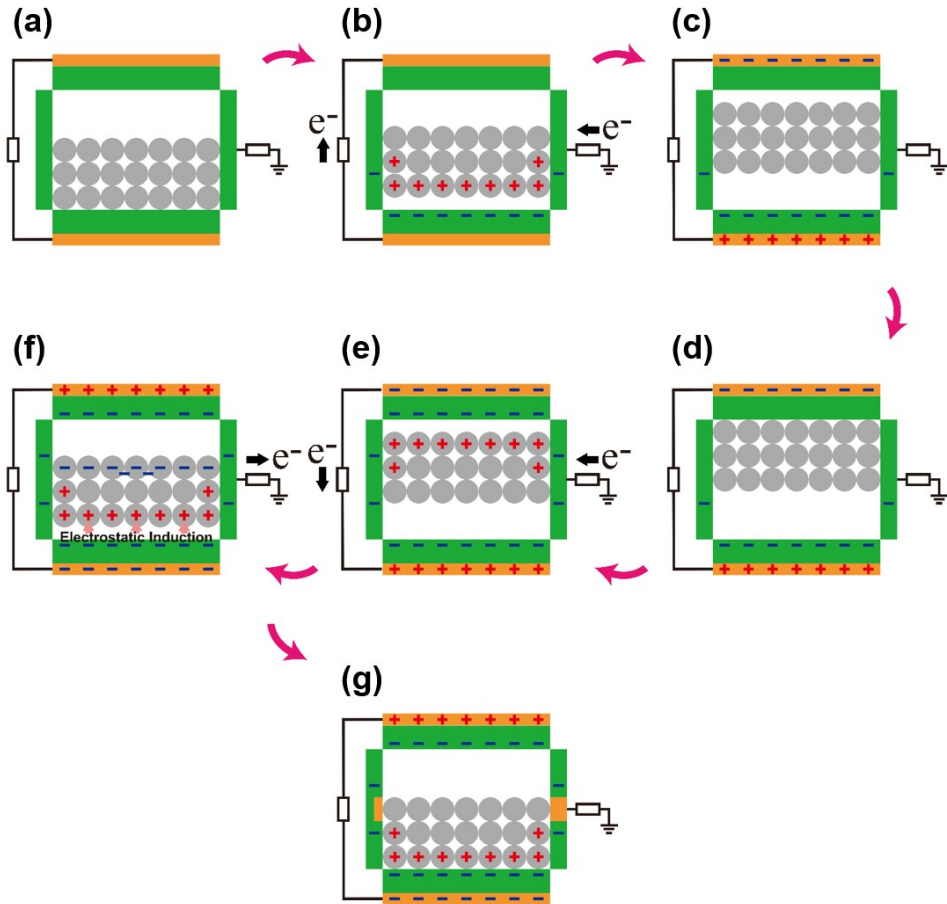

**Figure S3.** Working mechanism of ball-based grounded-metal-freestanding-layer triboelectric generator (B-GTEG) at 1<sup>st</sup> cycle. (a) Initial state: Al balls contact with bottom inner surface of PTFE cylinder. (b) First separation: Al balls move upwards and leave the bottom inner surface of PTFE cylinder. (c) Electrostatic induction (X): There is no electrostatic induction at the 1<sup>st</sup> cycle. (d) First contact: Al balls contact with the top inner surface of PTFE cylinder. (e) Second separation: Al balls move downwards and leave the top inner surface of PTFE cylinder. (f) Electrostatic induction: Electrophorus effect is occurred when Al balls is approaching the bottom inner surface of PTFE cylinder by electrostatic induction. (g) Contact to bottom surface: Al balls contact with bottom inner surface of PTFE cylinder.

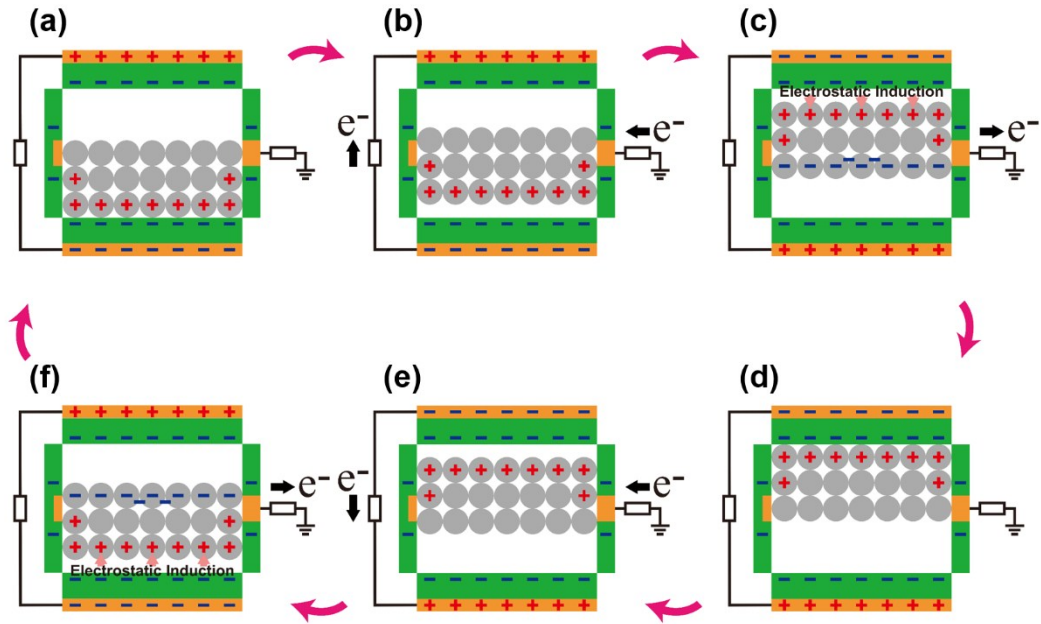

**Figure S4.** Working mechanism of ball based grounded-metal-freestanding-layer triboelectric generator (B-GTEG). (a) Contact to bottom surface: Al balls contact with bottom inner surface of PTFE cylinder. (b) Separation from bottom surface: Al balls move upwards and leave the bottom inner surface of PTFE cylinder. (c) Electrostatic induction: Electrophorus effect is occurred when Al balls is approaching the top inner surface of PTFE cylinder by electrostatic induction. (d) Contact to top surface: Al balls contact with the top inner surface of PTFE cylinder. (e) Separation from top surface: Al balls move downwards and leave the top inner surface of PTFE cylinder. (f) Electrostatic induction: Electrophorus effect is occurred when Al balls is approaching the bottom inner surface of PTFE cylinder by electrostatic induction.
